# Supplementary material for: Transcriptomic Effects of Acute Ultraviolet Radiation Exposure on Two Syntrichia Mosses
Source: Front Plant Sci. 2021 Oct 28;12:752913. doi: 10.3389/fpls.2021.752913 (PMC8581813; doi:10.3389/fpls.2021.752913)
Supplement: Supplementary file 2 [file Data_Sheet_2.xlsx]

## Sheet: Table S1 Read mapping rates
sample name	species	minutes of UVR exposure	replicate	overall read mapping rate
BR0min1	S. ruralis	0	1	0.519
BR0min2	S. ruralis	0	2	0.519
BR0min3	S. ruralis	0	3	0.523
BR10min1	S. ruralis	10	1	0.524
BR10min2	S. ruralis	10	2	0.526
BR10min3	S. ruralis	10	3	0.519
BR30min1	S. ruralis	30	1	0.517
BR30min2	S. ruralis	30	2	0.515
BR30min3	S. ruralis	30	3	0.51
SC0min1	S. caninervis	0	1	0.755
SC0min2	S. caninervis	0	2	0.708
SC0min3	S. caninervis	0	3	0.606
SC10min1	S. caninervis	10	1	0.706
SC10min2	S. caninervis	10	2	0.353
SC10min3	S. caninervis	10	3	0.665
SC30min1	S. caninervis	30	1	0.641
SC30min2	S. caninervis	30	2	0.579
SC30min3	S. caninervis	30	3	0.663

## Sheet: Table S2  S. ruralis T10vsT0
names	transcript_id	cell_components_terms	mol_functions_terms	bio_process_terms	length	baseMean	log2FoldChange	lfcSE	stat	pvalue	padj
Sc_g00611: uncharacterized protein LOC112290339	Sc_g00611			response to water	1486	150.632	-1.41122	0.382728	-3.68727	0.000226677	0.0151756
Sc_g01013: ribulose bisphosphate carboxylase small chain clone 512-like	Sc_g01013	plastid	monooxygenase activity, ribulose-bisphosphate carboxylase activity	photorespiration, carbon fixation, photosynthesis, oxidation-reduction process	1129	153.641	4.53208	1.23737	3.66267	0.000249602	0.0162092
Sc_g01690: two-on-two hemoglobin-3	Sc_g01690		oxygen binding, heme binding		940	124.963	1.31823	0.319064	4.13154	3.60336e-05	0.00477556
Sc_g03158: glyoxalase GLYI-6	Sc_g03158		transferase activity, lyase activity		1698	52.7871	-1.50938	0.422816	-3.56982	0.00035723	0.0205296
Sc_g03749: respiratory burst oxidase homolog protein B-like	Sc_g03749	membrane	peroxidase activity, calcium ion binding, oxidoreductase activity, acting on NAD(P)H, oxygen as acceptor	oxidation-reduction process	3298	443.947	1.14144	0.242518	4.70663	2.51851e-06	0.000584114
Sc_g05031: putative glucuronosyltransferase PGSIP8	Sc_g05031	integral component of membrane	transferase activity, transferring glycosyl groups	protein glycosylation	2542	99.7245	1.45502	0.353328	4.11804	3.82106e-05	0.00496279
Sc_g05715: anion exchanger family	Sc_g05715	integral component of membrane	inorganic anion exchanger activity	anion transport	2277	294.674	1.19646	0.285767	4.18685	2.82851e-05	0.00390816
Sc_g06129: metallothionein-like isoform X1	Sc_g06129	membrane, integral component of membrane			572	76.5116	-1.63213	0.509041	-3.20628	0.00134465	0.0479787
Sc_g09284: nitrate reductase [NADH]-like	Sc_g09284	cytosol	nitrate reductase (NADH) activity, heme binding, molybdenum ion binding, molybdopterin cofactor binding, nitrate reductase (NADPH) activity, FAD binding	nitric oxide biosynthetic process, nitrate assimilation, oxidation-reduction process	3299	1289.57	1.08894	0.232126	4.69114	2.71692e-06	0.000588122
Sc_g09951: BAG family molecular chaperone regulator 6	Sc_g09951		chaperone binding		3845	440.029	1.07878	0.190359	5.6671	1.45234e-08	1.04795e-05
Sc_g10812: high-affinity nitrate transporter 2.1-like	Sc_g10812	plasma membrane, plant-type vacuole membrane, integral component of membrane	nitrate transmembrane transporter activity, nitrite transmembrane transporter activity	nitrate transport, nitrite transport, transmembrane transport, cellular response to nitrate	2196	456.328	1.77148	0.299909	5.90673	3.48957e-09	3.03278e-06
Sc_g11807: mechanosensitive ion channel protein 1, mitochondrial-like	Sc_g11807	integral component of membrane		transmembrane transport	1639	562.053	-1.45191	0.139623	-10.3988	2.51083e-25	1.63053e-21
Sc_g12300: glutamate decarboxylase-like	Sc_g12300	cytosol	glutamate decarboxylase activity, calmodulin binding, pyridoxal phosphate binding	glutamate catabolic process	2171	552.101	-1.23002	0.254066	-4.84134	1.2897e-06	0.000380695
Sc_g13199: probable sodium/metabolite cotransporter BASS3, chloroplastic	Sc_g13199	chloroplast envelope, integral component of membrane			2012	939.114	1.05101	0.189377	5.54984	2.85924e-08	1.68799e-05
Sc_g13983: F-box protein At2g26850-like isoform X1	Sc_g13983	membrane	protein binding		1659	364.39	1.4297	0.213747	6.68875	2.25081e-11	3.6542e-08
Sc_g14586: pectinesterase 2-like	Sc_g14586	cell wall	enzyme inhibitor activity, pectinesterase activity	cell wall modification	1989	622.392	1.67428	0.210792	7.94277	1.97712e-15	6.41972e-12
Sc_g14895: germin-like protein	Sc_g14895	extracellular region, cell wall	manganese ion binding, nutrient reservoir activity		961	3370.26	-1.2838	0.19513	-6.57921	4.7295e-11	6.14267e-08
Sc_g16151: uncharacterized protein LOC112291873	Sc_g16151				915	62.5741	-2.00375	0.494466	-4.05236	5.07033e-05	0.00598667

## Sheet: Table S3  S. ruralis T30vsT0
names	transcript_id	cell_components_terms	mol_functions_terms	bio_process_terms	length	baseMean	log2FoldChange	lfcSE	stat	pvalue	padj
Sc_g00923: protein BIC1	Sc_g00923			blue light signaling pathway	1297	371.329	1.23874	0.237527	5.21515	1.83673e-07	3.61445e-05
Sc_g01366: uncharacterized protein LOC112287812	Sc_g01366				1669	457.027	1.81669	0.289435	6.27668	3.4588e-10	2.49572e-07
Sc_g02351: BES1/BZR1 homolog protein 4-like isoform X1	Sc_g02351		DNA-binding transcription factor activity, beta-amylase activity, amylopectin maltohydrolase activity	regulation of transcription, DNA-templated, brassinosteroid mediated signaling pathway	1896	673.535	1.10191	0.321909	3.42306	0.000619213	0.0261115
Sc_g03749: respiratory burst oxidase homolog protein B-like	Sc_g03749	membrane	peroxidase activity, calcium ion binding, oxidoreductase activity, acting on NAD(P)H, oxygen as acceptor	oxidation-reduction process	3298	443.947	1.18921	0.242263	4.90877	9.16491e-07	0.000145163
Sc_g04919: zinc finger with UFM1-specific peptidase domain protein	Sc_g04919		zinc ion binding		2648	272.293	1.33123	0.316781	4.20235	2.64153e-05	0.00209197
Sc_g05313: uncharacterized protein LOC112277919	Sc_g05313	integral component of membrane			2219	637.843	1.42336	0.28357	5.01944	5.18216e-07	8.68983e-05
Sc_g05556: protein ROOT HAIR DEFECTIVE 3-like	Sc_g05556	endoplasmic reticulum membrane, integral component of membrane	GTPase activity, GTP binding	endoplasmic reticulum membrane fusion, endoplasmic reticulum inheritance	2801	1808.99	1.70528	0.232001	7.35029	1.97773e-13	6.42169e-10
Sc_g05631: late embryogenesis abundant protein, group 3-like	Sc_g05631				2013	691.824	1.30989	0.206889	6.33136	2.43016e-10	1.97269e-07
Sc_g05714: Peroxisomal membrane 22 kDa (Mpv17/PMP22) family protein	Sc_g05714	cytoplasm, integral component of membrane			1639	4483.19	1.04519	0.171251	6.10324	1.03942e-09	6.74996e-07
Sc_g05715: anion exchanger family	Sc_g05715	integral component of membrane	inorganic anion exchanger activity	anion transport	2277	294.674	1.29914	0.285318	4.5533	5.28111e-06	0.000612952
Sc_g06135: Urea-proton symporter DUR3	Sc_g06135	plasma membrane, integral component of membrane	urea transmembrane transporter activity	urea transmembrane transport	2924	735.531	1.0451	0.280402	3.72714	0.000193665	0.0107492
Sc_g06791: protein MOTHER of FT and TFL1-like isoform X1	Sc_g06791				1205	449.376	1.24035	0.295986	4.19056	2.78266e-05	0.00217718
Sc_g06842: alpha carbonic anhydrase 5	Sc_g06842		carbonate dehydratase activity, zinc ion binding		1601	180.416	1.43032	0.446514	3.20331	0.00135855	0.0466796
Sc_g07931: senescence/dehydration-associated protein At4g35985, chloroplastic-like	Sc_g07931	plasma membrane		response to oomycetes, response to cold, response to salt stress	2303	1147.36	1.76268	0.511549	3.44577	0.000569434	0.0249416
Sc_g08899: protein EARLY-RESPONSIVE TO DEHYDRATION 7, chloroplastic-like isoform X2	Sc_g08899				1880	1009.66	1.01596	0.238999	4.25088	2.1293e-05	0.00180786
Sc_g08955: elongation factor Tu, chloroplastic	Sc_g08955	mitochondrion	translation elongation factor activity, GTPase activity, GTP binding	mitochondrial translational elongation	1530	1864.8	1.43306	0.273584	5.2381	1.62236e-07	3.54851e-05
Sc_g09163: two-component response regulator ORR41-like	Sc_g09163	intracellular, integral component of membrane	phosphorelay sensor kinase activity	phosphorelay signal transduction system, signal transduction by protein phosphorylation	3019	1895.9	1.19184	0.142839	8.34392	7.18678e-17	4.6671e-13
Sc_g09951: BAG family molecular chaperone regulator 6	Sc_g09951		chaperone binding		3845	440.029	1.12927	0.190028	5.94269	2.80389e-09	1.2139e-06
Sc_g10016: beta-carotene hydroxylase	Sc_g10016	integral component of membrane	iron ion binding, oxidoreductase activity	lipid biosynthetic process, oxidation-reduction process	1586	537.176	1.18938	0.199724	5.95511	2.59901e-09	1.2139e-06
Sc_g10057: protein SRC2-like	Sc_g10057	membrane, integral component of membrane			1069	1196.88	1.08764	0.224018	4.85517	1.20286e-06	0.00018166
Sc_g10629: hypothetical protein PHYPA_004803	Sc_g10629				568	203.294	1.27885	0.294796	4.33808	1.43733e-05	0.00135276
Sc_g10637: hypothetical protein PHYPA_004803	Sc_g10637				1233	801.271	1.23485	0.28464	4.33828	1.436e-05	0.00135276
Sc_g10812: high-affinity nitrate transporter 2.1-like	Sc_g10812	plasma membrane, plant-type vacuole membrane, integral component of membrane	nitrate transmembrane transporter activity, nitrite transmembrane transporter activity	nitrate transport, nitrite transport, transmembrane transport, cellular response to nitrate	2196	456.328	1.29724	0.300439	4.31781	1.57582e-05	0.00146191
Sc_g10872: heavy metal-associated isoprenylated plant protein 28-like	Sc_g10872		metal ion binding	metal ion transport	1296	64.8154	1.93392	0.459987	4.20429	2.61904e-05	0.00209197
Sc_g11369: transmembrane protein 205-like	Sc_g11369	endoplasmic reticulum, membrane, integral component of membrane			2825	3500.89	1.09787	0.188131	5.83567	5.35748e-09	1.93286e-06
Sc_g11382: light-inducible protein CPRF2	Sc_g11382		DNA-binding transcription factor activity	regulation of transcription, DNA-templated	1967	155.047	1.21835	0.354917	3.43276	0.000597471	0.0255262
Sc_g11458: protein NRT1/ PTR FAMILY 8.1	Sc_g11458	plasma membrane, plasmodesma, integral component of membrane	tripeptide transmembrane transporter activity	nitrogen compound metabolic process, dipeptide transport, tripeptide transport, transmembrane transport	2208	459.065	1.51884	0.354964	4.27886	1.87856e-05	0.00167115
Sc_g11726: putative quinone-oxidoreductase homolog, chloroplastic	Sc_g11726		oxidoreductase activity	oxidation-reduction process	1331	379.064	-1.02816	0.257387	-3.99461	6.47996e-05	0.00457401
Sc_g11968: stress protein DDR48-like	Sc_g11968		metal ion binding		1793	2268.76	1.05072	0.162747	6.45613	1.07412e-10	9.96474e-08
Sc_g12044: uncharacterized protein LOC112273529 isoform X1	Sc_g12044	cell	electron transfer activity, protein disulfide oxidoreductase activity	electron transport chain, cell redox homeostasis, oxidation-reduction process	2549	355.642	1.14376	0.281366	4.06502	4.80274e-05	0.00362663
Sc_g12583: metalloendoproteinase 2-MMP	Sc_g12583	extracellular matrix	metalloendopeptidase activity, zinc ion binding	proteolysis	1548	69.4464	1.02883	0.320062	3.21446	0.00130689	0.0455319
Sc_g13199: probable sodium/metabolite cotransporter BASS3, chloroplastic	Sc_g13199	chloroplast envelope, integral component of membrane			2012	939.114	1.37791	0.188913	7.29386	3.01208e-13	6.52014e-10
Sc_g13670: uncharacterized protein LOC112287014	Sc_g13670	integral component of membrane			1192	2059.55	1.00436	0.193214	5.19818	2.01252e-07	3.84391e-05
Sc_g13822: transcription factor KUA1-like isoform X2	Sc_g13822	nucleus	DNA binding, zinc ion binding		2101	1749.67	1.03036	0.191577	5.37832	7.51824e-08	1.95294e-05
Sc_g13874: Late embryogenesis abundant protein D-29	Sc_g13874	cytosol		floral organ abscission	2046	1167.31	1.2536	0.210575	5.95323	2.62898e-09	1.2139e-06
Sc_g14586: pectinesterase 2-like	Sc_g14586	cell wall	enzyme inhibitor activity, pectinesterase activity	cell wall modification	1989	622.392	1.42294	0.21102	6.74314	1.54995e-11	2.01308e-08
Sc_g14895: germin-like protein	Sc_g14895	extracellular region, cell wall	manganese ion binding, nutrient reservoir activity		961	3370.26	-1.15185	0.19501	-5.90659	3.49261e-09	1.41756e-06
Sc_g15307: E3 ubiquitin-protein ligase ATL31-like	Sc_g15307	membrane, integral component of membrane	ligase activity, ubiquitin protein ligase binding	protein ubiquitination	1349	555.39	1.33556	0.261662	5.10413	3.32328e-07	5.99483e-05

## Sheet: Table S4 S. caninervis T10vsT0
names	transcript_id	cell_components_terms	mol_functions_terms	bio_process_terms	length	baseMean	log2FoldChange	lfcSE	stat	pvalue	padj
Sc_g00710: sorbitol dehydrogenase	Sc_g00710	mitochondrion, cytosol, plasmodesma, integral component of membrane	L-iditol 2-dehydrogenase activity, zinc ion binding	oxidation-reduction process	1477	3151.44	-1.43429	0.291098	-4.92717	8.34288e-07	0.000948308
Sc_g04413: ribosomal protein S19 (chloroplast)	Sc_g04413	ribosome, chloroplast, plastid, small ribosomal subunit	RNA binding, structural constituent of ribosome, rRNA binding	translation	1928	902.014	-1.01508	0.255459	-3.97353	7.08142e-05	0.040246
Sc_g04894: uncharacterized protein LOC112281062	Sc_g04894			response to water	1179	192.902	-3.20528	0.522093	-6.1393	8.28848e-10	5.65274e-06
Sc_g08899: protein EARLY-RESPONSIVE TO DEHYDRATION 7, chloroplastic-like isoform X2	Sc_g08899				1880	919.951	-1.10977	0.217591	-5.10026	3.39191e-07	0.000771095
Sc_g09325: chloroplastic early light-induced protein	Sc_g09325	integral component of membrane			908	244.288	1.3983	0.279842	4.99673	5.83106e-07	0.000795356
Sc_g10213: ABC1/COQ8 Serine/Threonine kinase	Sc_g10213		protein kinase activity, ATP binding	protein phosphorylation	2931	1208.28	1.14121	0.214492	5.32051	1.03479e-07	0.000352864
Sc_g10496: mitochondrial carnitine/acylcarnitine carrier-like protein	Sc_g10496	integral component of membrane	L-ornithine transmembrane transporter activity	mitochondrial L-ornithine transmembrane transport	1336	3668.6	1.16337	0.289362	4.02046	5.80849e-05	0.0360126
Sc_g14379: poly [ADP-ribose] polymerase 3	Sc_g14379		NAD+ ADP-ribosyltransferase activity	protein ADP-ribosylation	2917	3442.83	-1.49022	0.296271	-5.02993	4.90657e-07	0.000795356
Sc_g15551: succinate dehydrogenase [ubiquinone] iron-sulfur subunit 2, mitochondrial	Sc_g15551	mitochondrial inner membrane	succinate dehydrogenase (ubiquinone) activity, electron transfer activity, metal ion binding, 2 iron, 2 sulfur cluster binding, 3 iron, 4 sulfur cluster binding, 4 iron, 4 sulfur cluster binding	tricarboxylic acid cycle, electron transport chain	1158	694.332	-1.46341	0.322636	-4.53579	5.73872e-06	0.00559116
Sc_g15997: protein DOG1-like 3	Sc_g15997		sequence-specific DNA binding	transcription, DNA-templated	1831	250.482	-1.2956	0.303773	-4.26502	1.99889e-05	0.0151471

## Sheet: Table S5 S. caninervis T30vsT0
names	transcript_id	cell_components_terms	mol_functions_terms	bio_process_terms	length	baseMean	log2FoldChange	lfcSE	stat	pvalue	padj
Sc_g00310: stress enhanced protein 2, chloroplastic	Sc_g00310	membrane			1399	1598.64	1.17912	0.261149	4.51512	6.32823e-06	0.000959079
Sc_g00442: LRR receptor-like serine/threonine-protein kinase GSO1 isoform X1	Sc_g00442	membrane	protein kinase activity, ATP binding	protein phosphorylation, response to stimulus	3801	340.573	-1.22653	0.3388	-3.62021	0.000294362	0.0154427
Sc_g00445: histone-lysine N-methyltransferase 2D-like isoform X1	Sc_g00445		transcription coregulator activity	regulation of transcription, DNA-templated	4319	2677.73	-1.16681	0.319049	-3.65714	0.000255048	0.013805
Sc_g00568: putative 12-oxophytodienoate reductase 11	Sc_g00568		FMN binding, oxidoreductase activity	oxidation-reduction process	1723	270.93	1.54436	0.260099	5.93759	2.89243e-09	1.40903e-06
Sc_g00596: phytochrome E isoform X1	Sc_g00596	intracellular		phosphorelay signal transduction system, regulation of transcription, DNA-templated	1802	4005.05	-1.66351	0.35668	-4.66388	3.1031e-06	0.000529078
Sc_g00609: adenine phosphoribosyltransferase	Sc_g00609		transferase activity, transferase activity, transferring glycosyl groups		973	420.99	1.03483	0.231123	4.47739	7.55596e-06	0.00112025
Sc_g00779: late embryogenesis abundant protein, group 3-like	Sc_g00779				800	271.052	1.63487	0.413461	3.95411	7.68205e-05	0.00620607
Sc_g00893: polygalacturonase non-catalytic subunit AroGP3-like	Sc_g00893	membrane, integral component of membrane			1370	641.406	-1.19289	0.27499	-4.33793	1.43828e-05	0.00185077
Sc_g01049: hypothetical protein PHYPA_017479	Sc_g01049	integral component of membrane			714	237.179	1.87923	0.389504	4.82468	1.40227e-06	0.000318783
Sc_g01248: S-adenosyl-L-methionine-dependent methyltransferase superfamily protein	Sc_g01248	integral component of membrane	methyltransferase activity	methylation	1028	605.057	1.63238	0.272933	5.98087	2.21955e-09	1.16441e-06
Sc_g01440: uncharacterized protein LOC112280290	Sc_g01440		metal ion binding	metal ion transport	1251	570.702	1.25715	0.398057	3.15822	0.00158735	0.0489853
Sc_g01471: DNA/RNA-binding protein Alba-like protein	Sc_g01471		nucleic acid binding		793	360.372	1.2833	0.249683	5.13973	2.75136e-07	7.5057e-05
Sc_g01490: hypothetical protein PHYPA_006797	Sc_g01490				568	1652.04	1.4821	0.350881	4.22394	2.40073e-05	0.00282293
Sc_g01559: Class I heat shock protein	Sc_g01559				1253	1890.11	-1.048	0.274693	-3.81515	0.000136101	0.00950065
Sc_g01825: hypothetical protein PHYPA_016582	Sc_g01825				1137	444.113	1.10347	0.214133	5.15319	2.56097e-07	7.27743e-05
Sc_g02057: C2 and GRAM domain-containing protein At1g03370-like isoform X1	Sc_g02057	integral component of membrane			3539	683.375	1.48498	0.395776	3.75208	0.000175374	0.0108732
Sc_g02061: ACT domain-containing protein ACR3-like	Sc_g02061				1834	1483.17	-1.03448	0.208841	-4.95345	7.29099e-07	0.000184165
Sc_g02065: ABC transporter I family member 21-like isoform X1	Sc_g02065		ATP binding, ATPase activity		1104	247.938	1.05296	0.278043	3.78706	0.000152441	0.00980802
Sc_g02351: BES1/BZR1 homolog protein 4-like isoform X1	Sc_g02351		DNA-binding transcription factor activity, beta-amylase activity, amylopectin maltohydrolase activity	regulation of transcription, DNA-templated, brassinosteroid mediated signaling pathway	1896	492.934	-1.2635	0.318397	-3.9683	7.23886e-05	0.00614111
Sc_g02403: phytoene synthase	Sc_g02403	integral component of membrane	farnesyl-diphosphate farnesyltransferase activity, geranylgeranyl-diphosphate geranylgeranyltransferase activity, squalene synthase activity	ergosterol biosynthetic process, carotenoid biosynthetic process	1718	911.916	1.61846	0.309287	5.23287	1.66899e-07	5.17388e-05
Sc_g02457: uncharacterized protein LOC112285873	Sc_g02457				2501	535.623	-1.32044	0.400851	-3.29408	0.000987442	0.0352584
Sc_g02607: probable LRR receptor-like serine/threonine-protein kinase At4g36180	Sc_g02607	plasmodesma, integral component of membrane	protein kinase activity, protein binding, ATP binding	protein autophosphorylation	3394	202.046	-1.39222	0.434688	-3.20281	0.00136094	0.0442963
Sc_g02848: protein PROTON GRADIENT REGULATION 5, chloroplastic	Sc_g02848	chloroplast	electron transfer activity	response to high light intensity, photosynthetic electron transport in photosystem I	1021	1209.35	1.58602	0.211453	7.50056	6.35438e-14	1.08342e-10
Sc_g03111: homeobox protein LUMINIDEPENDENS isoform X2	Sc_g03111	nucleus	DNA binding		4299	831.038	-1.30156	0.393732	-3.30569	0.000947436	0.0341879
Sc_g03123: alpha-glucan water dikinase 1, chloroplastic	Sc_g03123		ATP binding, alpha-glucan, water dikinase activity	phosphorylation	4712	482.029	-1.30404	0.292971	-4.45107	8.5443e-06	0.00118923
Sc_g03341: uncharacterized protein LOC112284767 isoform X1	Sc_g03341				7983	2079.8	-1.18994	0.359767	-3.30754	0.00094118	0.0341428
Sc_g03641: mitochondrial substrate carrier family protein E-like	Sc_g03641	integral component of membrane	transmembrane transporter activity	mitochondrial transport, transmembrane transport	1370	266.444	1.9574	0.456542	4.28745	1.80732e-05	0.00224108
Sc_g03848: glycoside hydrolase	Sc_g03848		hydrolase activity, hydrolyzing O-glycosyl compounds		2628	652.417	1.48537	0.325766	4.55963	5.1245e-06	0.00082649
Sc_g03997: uncharacterized protein LOC112273662	Sc_g03997				677	53.5862	1.57229	0.467911	3.36023	0.000778763	0.0300066
Sc_g04152: uncharacterized protein LOC112281148	Sc_g04152	integral component of membrane			727	2028.91	1.20596	0.248737	4.84835	1.24494e-06	0.000292776
Sc_g04272: BTB/POZ domain-containing protein At1g67900-like	Sc_g04272			positive gravitropism	2612	321.258	1.09118	0.31694	3.44284	0.000575632	0.0251178
Sc_g04342: 22-kDa protein of chloroplasts in green spores	Sc_g04342				1120	182.64	2.16496	0.633811	3.41578	0.000635999	0.0265614
Sc_g04886: phytochrome	Sc_g04886			phosphorelay signal transduction system, regulation of transcription, DNA-templated	1868	3490.12	-1.55553	0.283211	-5.49248	3.96318e-08	1.29363e-05
Sc_g04973: phytochrome	Sc_g04973	nucleus	phosphorelay sensor kinase activity, photoreceptor activity, protein homodimerization activity	phosphorelay signal transduction system, regulation of transcription, DNA-templated, detection of visible light, red, far-red light phototransduction, protein-tetrapyrrole linkage, protein-chromophore linkage, signal transduction by protein phosphorylation	3908	2391.97	-1.57772	0.376611	-4.18924	2.79888e-05	0.00312924
Sc_g04986: pentatricopeptide repeat-containing protein At3g09650, chloroplastic-like	Sc_g04986		protein binding		2597	1327.19	1.22985	0.316098	3.89074	9.99402e-05	0.00749003
Sc_g05211: treponemal membrane protein B-like isoform X1	Sc_g05211				832	857.018	2.36534	0.273697	8.6422	5.51388e-18	1.88023e-14
Sc_g05313: uncharacterized protein LOC112277919	Sc_g05313	integral component of membrane			2219	1023.55	2.03999	0.264984	7.69854	1.37628e-14	3.12875e-11
Sc_g05340: uncharacterized protein LOC112290220	Sc_g05340	chloroplast, integral component of membrane			1041	617.23	1.03801	0.220472	4.70811	2.50028e-06	0.000468368
Sc_g05389: microsomal glutathione S-transferase 3-like	Sc_g05389	nuclear envelope, endoplasmic reticulum, integral component of membrane	glutathione transferase activity, glutathione peroxidase activity		694	78.9816	1.31882	0.385855	3.41792	0.000631027	0.0265614
Sc_g05535: Dof transcription factor	Sc_g05535		DNA binding	regulation of transcription, DNA-templated	2648	4571.07	-1.33321	0.368945	-3.61358	0.000301995	0.0157222
Sc_g05631: late embryogenesis abundant protein, group 3-like	Sc_g05631				2013	3552.69	2.46315	0.409333	6.01746	1.77171e-09	1.00692e-06
Sc_g05692: lon protease like, mitochondrial	Sc_g05692			protein localization to plasma membrane	3895	295.935	-1.30202	0.407391	-3.196	0.00139345	0.0442963
Sc_g05714: Peroxisomal membrane 22 kDa (Mpv17/PMP22) family protein	Sc_g05714	cytoplasm, integral component of membrane			1639	4114.9	1.36607	0.33582	4.06787	4.74448e-05	0.00482945
Sc_g05890: predicted protein	Sc_g05890		iron ion binding		775	1218.45	2.94848	0.458006	6.43764	1.21346e-10	1.03448e-07
Sc_g05965: auxin response factor 19-like isoform X1	Sc_g05965	nucleus	DNA binding, protein binding	regulation of transcription, DNA-templated, auxin-activated signaling pathway	3026	932.315	-1.02798	0.305589	-3.36395	0.000768362	0.029774
Sc_g06297: universal stress protein PHOS34-like	Sc_g06297				1514	693.048	1.32781	0.388231	3.42015	0.000625863	0.0265117
Sc_g06346: S-type anion channel SLAH2-like isoform X1	Sc_g06346	integral component of membrane	voltage-gated anion channel activity	cellular ion homeostasis, transmembrane transport	1705	180.099	-1.4154	0.438669	-3.22658	0.00125281	0.0425083
Sc_g06420: pollen-specific leucine-rich repeat extensin-like protein 2	Sc_g06420		metal ion binding	metal ion transport	1781	315.972	-1.31723	0.376017	-3.50311	0.000459867	0.0214815
Sc_g06453: dnaJ homolog subfamily B member 6-B	Sc_g06453	integral component of membrane			706	194.427	1.14416	0.315153	3.63051	0.000282866	0.0149546
Sc_g06479: increased DNA methylation 1	Sc_g06479		metal ion binding		3256	933.337	-1.1724	0.336347	-3.4857	0.000490855	0.0226191
Sc_g06605: transcription factor HEC2-like	Sc_g06605		protein dimerization activity	regulation of transcription, DNA-templated	1635	902.614	-1.711	0.451637	-3.78844	0.000151596	0.00980802
Sc_g06791: protein MOTHER of FT and TFL1-like isoform X1	Sc_g06791				1205	192.535	1.37544	0.364573	3.77274	0.000161461	0.0102068
Sc_g06863: uncharacterized protein LOC112282501	Sc_g06863				2237	1179.36	1.29623	0.264846	4.89429	9.86635e-07	0.000240316
Sc_g07148: transcription factor PIF4	Sc_g07148	nucleus	DNA-binding transcription activator activity, RNA polymerase II-specific, protein dimerization activity	positive regulation of transcription by RNA polymerase II	2641	3199.59	-1.09967	0.292033	-3.76556	0.000166178	0.0103976
Sc_g07164: cytoplasmic FMR1 interacting protein	Sc_g07164				2594	519.239	-1.30176	0.313796	-4.14842	3.34779e-05	0.00362411
Sc_g07311: lipid phosphate phosphatase 2-like	Sc_g07311	integral component of membrane	phosphatidate phosphatase activity		1484	3552.98	1.03023	0.252812	4.07507	4.60001e-05	0.00475334
Sc_g07359: uncharacterized protein LOC112283270	Sc_g07359	membrane			677	541.364	2.02599	0.307435	6.58998	4.39882e-11	6e-08
Sc_g07414: pectinesterase inhibitor 10-like	Sc_g07414	membrane, integral component of membrane			1516	820.08	-1.07615	0.336445	-3.19859	0.00138102	0.0442963
Sc_g07833: uncharacterized protein LOC112283261	Sc_g07833				735	443.695	1.16522	0.24475	4.76087	1.92757e-06	0.000381257
Sc_g07951: root phototropism protein 3	Sc_g07951		protein binding	protein ubiquitination	2520	251.212	-2.01416	0.355873	-5.65977	1.51577e-08	5.7431e-06
Sc_g08003: uncharacterized protein LOC112293091	Sc_g08003	integral component of membrane			848	1734.69	1.3522	0.265525	5.09256	3.53264e-07	9.26638e-05
Sc_g08023: probable protein phosphatase 2C 17 isoform X2	Sc_g08023		protein serine/threonine phosphatase activity	protein dephosphorylation	1401	532.124	1.04396	0.249581	4.18283	2.87897e-05	0.00316687
Sc_g08048: Rieske [2Fe-2S] domain, putative	Sc_g08048	chloroplast thylakoid membrane, chloroplast envelope	nitrite reductase [NAD(P)H] activity, 2 iron, 2 sulfur cluster binding	photosystem II assembly, nitrate assimilation, photosystem II stabilization, oxidation-reduction process	1158	1953.54	1.34957	0.282018	4.78539	1.70652e-06	0.000363702
Sc_g08095: pollen-specific leucine-rich repeat extensin-like protein 2	Sc_g08095		metal ion binding	metal ion transport	1494	1231.71	1.08875	0.29114	3.7396	0.000184317	0.0113247
Sc_g08230: ---NA---	Sc_g08230				568	1002.07	1.20444	0.328045	3.67158	0.00024106	0.013587
Sc_g08268: probable solanesyl-diphosphate synthase 3, chloroplastic	Sc_g08268		transferase activity, transferring alkyl or aryl (other than methyl) groups	isoprenoid biosynthetic process, photosynthesis	1872	1339.54	1.09669	0.304925	3.59659	0.000322421	0.0163874
Sc_g08323: NAD(P)-binding Rossmann-fold superfamily protein	Sc_g08323	chloroplast thylakoid	translation initiation factor activity	translational initiation, photosystem II assembly	1480	901.771	1.091	0.308062	3.54151	0.00039784	0.0194728
Sc_g08557: transcription factor HEC2-like	Sc_g08557		protein dimerization activity	regulation of transcription, DNA-templated	1034	680.682	-1.34796	0.365232	-3.69068	0.000223653	0.0130369
Sc_g08702: Ubiquinol cytochrome c reductase subunit RIP1	Sc_g08702	membrane	oxidoreductase activity, 2 iron, 2 sulfur cluster binding	oxidation-reduction process	2062	525.971	-1.60524	0.465805	-3.44616	0.000568614	0.0250278
Sc_g08899: protein EARLY-RESPONSIVE TO DEHYDRATION 7, chloroplastic-like isoform X2	Sc_g08899				1880	919.951	1.17596	0.214139	5.49159	3.98331e-08	1.29363e-05
Sc_g09325: chloroplastic early light-induced protein	Sc_g09325	integral component of membrane			908	244.288	1.75695	0.279416	6.28791	3.21761e-10	1.99492e-07
Sc_g09602: uncharacterized protein LOC112287725	Sc_g09602				759	1541.53	1.14632	0.353777	3.24024	0.00119428	0.0411362
Sc_g09684: peroxiredoxin Q, chloroplastic-like	Sc_g09684	chloroplast stromal thylakoid, chloroplast thylakoid membrane, chloroplast envelope, plastoglobule	peroxidase activity, peroxiredoxin activity	cell redox homeostasis, oxidation-reduction process, cellular oxidant detoxification	943	1638.73	1.04874	0.295817	3.54522	0.000392285	0.0194728
Sc_g09783: inactive protein kinase SELMODRAFT_444075 isoform X1	Sc_g09783		protein kinase activity, ATP binding	protein phosphorylation	3179	698.093	-1.36476	0.372343	-3.66533	0.000247019	0.0136094
Sc_g09950: two-component response regulator ARR15-like	Sc_g09950	intracellular		phosphorelay signal transduction system	320	171.081	-1.20008	0.344763	-3.48089	0.000499755	0.0228747
Sc_g10016: beta-carotene hydroxylase	Sc_g10016	integral component of membrane	iron ion binding, oxidoreductase activity	lipid biosynthetic process, oxidation-reduction process	1586	458.207	1.2449	0.259721	4.79324	1.64108e-06	0.000361038
Sc_g10056: protein SRC2-like	Sc_g10056				805	390.155	1.04287	0.325499	3.20392	0.00135568	0.0442963
Sc_g10057: protein SRC2-like	Sc_g10057	membrane, integral component of membrane			1069	1156.08	1.89025	0.365402	5.17307	2.30284e-07	6.82843e-05
Sc_g10142: caffeoylshikimate esterase-like isoform X2	Sc_g10142	integral component of membrane			1875	929.888	1.61972	0.276298	5.86224	4.56672e-09	2.07633e-06
Sc_g10164: 50S ribosomal protein L34, chloroplastic	Sc_g10164	mitochondrial large ribosomal subunit	structural constituent of ribosome	translation	694	962.776	1.16376	0.293615	3.96357	7.38374e-05	0.00614111
Sc_g10331: early light-induced protein, chloroplastic-like	Sc_g10331	chloroplast thylakoid membrane, integral component of membrane			1020	577.775	1.74346	0.412625	4.22529	2.38629e-05	0.00282293
Sc_g10451: putative Late embryogenesis abundant protein, LEA-14	Sc_g10451	integral component of membrane		response to desiccation	1098	783.264	1.36908	0.300811	4.55127	5.33219e-06	0.00082649
Sc_g10489: GATA zinc finger domain-containing protein 14-like isoform X2	Sc_g10489		metal ion binding	metal ion transport	1947	415.662	-1.5795	0.459566	-3.43695	0.00058831	0.0253942
Sc_g10496: mitochondrial carnitine/acylcarnitine carrier-like protein	Sc_g10496	integral component of membrane	L-ornithine transmembrane transporter activity	mitochondrial L-ornithine transmembrane transport	1336	3668.6	1.11121	0.289413	3.83952	0.000123275	0.00884988
Sc_g10586: FAD-linked sulfhydryl oxidase ERV1	Sc_g10586		flavin-linked sulfhydryl oxidase activity	oxidation-reduction process	1020	368.897	1.60368	0.279665	5.7343	9.79169e-09	3.9282e-06
Sc_g10629: hypothetical protein PHYPA_004803	Sc_g10629				568	256.788	3.15713	0.488456	6.4635	1.02312e-10	9.96809e-08
Sc_g10637: hypothetical protein PHYPA_004803	Sc_g10637				1233	654.931	3.12972	0.49208	6.3602	2.01497e-10	1.5269e-07
Sc_g10688: telomere repeat-binding protein 5 isoform X3	Sc_g10688		DNA binding, protein binding		4016	2426.07	-1.17126	0.316766	-3.69754	0.000217701	0.0130239
Sc_g11209: phospholipase D zeta 1 isoform X1	Sc_g11209	intracellular	phospholipase D activity, N-acylphosphatidylethanolamine-specific phospholipase D activity	phosphatidic acid biosynthetic process, lipid catabolic process, inositol lipid-mediated signaling	3712	454.973	-1.2587	0.370592	-3.39645	0.00068265	0.0274548
Sc_g11247: putative LOV domain-containing protein	Sc_g11247	intracellular	phosphorelay sensor kinase activity	phosphorelay signal transduction system, signal transduction by protein phosphorylation	1748	2591.93	1.15736	0.243252	4.75786	1.9566e-06	0.000381257
Sc_g11300: hyphally regulated cell wall protein 3-like	Sc_g11300				1186	4617.32	1.07607	0.323769	3.32357	0.000888725	0.0327627
Sc_g11477: probable 2-carboxy-D-arabinitol-1-phosphatase	Sc_g11477	cytoplasm			1556	2609.64	1.04919	0.284599	3.68655	0.000227313	0.0130574
Sc_g11499: probable plastidic glucose transporter 2	Sc_g11499	plastid, integral component of membrane	transmembrane transporter activity	transmembrane transport	2477	3439	1.09604	0.173138	6.33043	2.44483e-10	1.66737e-07
Sc_g11625: cyclin-D4-2-like isoform X1	Sc_g11625	cyclin-dependent protein kinase holoenzyme complex, nucleus, cytoplasm	protein kinase activity, cyclin-dependent protein serine/threonine kinase regulator activity, protein kinase binding	regulation of cyclin-dependent protein serine/threonine kinase activity, regulation of mitotic nuclear division, positive regulation of cell population proliferation, positive regulation of cell cycle	1488	833.832	-1.4039	0.350018	-4.01093	6.04794e-05	0.00557391
Sc_g11968: stress protein DDR48-like	Sc_g11968		metal ion binding		1793	6672.05	1.34841	0.391795	3.44163	0.000578225	0.0251178
Sc_g11991: dehydroascorbate reductase	Sc_g11991		protein binding, transferase activity, glutathione dehydrogenase (ascorbate) activity	oxidation-reduction process, cellular oxidant detoxification	1017	2121.18	1.0525	0.328625	3.20274	0.00136126	0.0442963
Sc_g12072: uncharacterized protein LOC112289697	Sc_g12072				612	2025.32	1.03418	0.246367	4.19774	2.69597e-05	0.00306442
Sc_g12176: DNA polymerase eta isoform X1	Sc_g12176		damaged DNA binding	DNA repair	2423	328.084	-1.37644	0.404711	-3.40105	0.000671267	0.0272503
Sc_g12323: protein HESO1-like	Sc_g12323		nucleotidyltransferase activity		2820	380.603	-1.04259	0.301398	-3.4592	0.000541787	0.0244701
Sc_g12657: uncharacterized protein LOC112283607	Sc_g12657				887	426.148	1.16347	0.262174	4.43777	9.08957e-06	0.00123982
Sc_g12960: probable trehalase	Sc_g12960		alpha,alpha-trehalase activity	trehalose metabolic process	2597	664.643	-1.39395	0.337141	-4.13461	3.55552e-05	0.00378885
Sc_g12986: E3 ubiquitin-protein ligase Hakai	Sc_g12986		nucleic acid binding		3054	66.3758	-1.54973	0.456371	-3.39577	0.000684358	0.0274548
Sc_g13060: ---NA---	Sc_g13060				235	239.225	1.3451	0.370029	3.63512	0.00027785	0.0148042
Sc_g13121: uncharacterized oxidoreductase At4g09670-like	Sc_g13121		oxidoreductase activity	oxidation-reduction process	1357	2045.47	1.30176	0.326736	3.98412	6.77304e-05	0.00590736
Sc_g13205: ---NA---	Sc_g13205				1069	6861.43	1.71836	0.295991	5.80544	6.41959e-09	2.73635e-06
Sc_g13403: uncharacterized protein LOC112285453 isoform X2	Sc_g13403				761	1549.5	2.41443	0.27017	8.93672	4.00905e-19	2.73417e-15
Sc_g13432: nuclear pore complex protein NUP62-like	Sc_g13432	nuclear pore, cytosol, integral component of membrane, nuclear periphery	structural constituent of nuclear pore	nucleocytoplasmic transport, negative regulation of auxin mediated signaling pathway	2731	419.393	-1.10944	0.291021	-3.81224	0.000137713	0.00950065
Sc_g13670: uncharacterized protein LOC112287014	Sc_g13670	integral component of membrane			1192	2131.97	2.02046	0.366242	5.51674	3.4534e-08	1.23959e-05
Sc_g13874: Late embryogenesis abundant protein D-29	Sc_g13874	cytosol		floral organ abscission	2046	3510.9	1.31607	0.373435	3.52422	0.000424736	0.0202544
Sc_g13885: protein ODORANT1-like	Sc_g13885	nucleus	sequence-specific DNA binding, transcription regulatory region DNA binding	cell differentiation	1638	1877.06	-1.07573	0.293217	-3.66872	0.000243765	0.0136094
Sc_g13889: histone deacetylase 19-like isoform X1	Sc_g13889	histone deacetylase complex	NAD-dependent histone deacetylase activity (H3-K14 specific), metal ion binding	DNA mediated transformation, pathogenesis, jasmonic acid and ethylene-dependent systemic resistance, histone acetylation, negative regulation of transcription, DNA-templated, histone H3 deacetylation, positive regulation of stem cell population maintenance, regulation of multicellular organismal development	2415	843.725	-1.05529	0.326447	-3.23265	0.00122648	0.0419715
Sc_g14657: zinc finger protein CONSTANS-LIKE 6-like	Sc_g14657	intracellular	protein binding, zinc ion binding		1993	340.632	-1.06623	0.323858	-3.29226	0.000993842	0.0353021
Sc_g14738: cytochrome c	Sc_g14738	mitochondrial intermembrane space, vacuolar membrane, cytosol, respirasome	copper ion binding, electron transfer activity, heme binding	mitochondrial electron transport, ubiquinol to cytochrome c, mitochondrial electron transport, cytochrome c to oxygen, gibberellic acid homeostasis	718	1048.12	1.27502	0.320222	3.98169	6.84284e-05	0.00590736
Sc_g14898: ABC transporter F family member 5	Sc_g14898		ATP binding, ATPase activity		2756	5823.37	1.04228	0.259449	4.01728	5.88726e-05	0.00550016
Sc_g14943: linoleate 9S-lipoxygenase-like	Sc_g14943		protein binding, oxidoreductase activity, acting on single donors with incorporation of molecular oxygen, incorporation of two atoms of oxygen, metal ion binding	oxidation-reduction process	2965	181.998	-1.61084	0.398752	-4.03971	5.35168e-05	0.00528963
Sc_g15396: cryptochrome DASH, chloroplastic/mitochondrial	Sc_g15396		DNA photolyase activity	DNA repair	1911	147.378	1.0752	0.320537	3.35437	0.000795467	0.0304056
Sc_g15424: diacylglycerol O-acyltransferase 2	Sc_g15424	integral component of membrane	transferase activity, transferring acyl groups other than amino-acyl groups		1842	1252.74	1.60899	0.342838	4.69316	2.6902e-06	0.00048282
Sc_g15448: lipase 1-like isoform X2	Sc_g15448	integral component of membrane	lipase activity	cellular lipid metabolic process	2975	1577.88	1.26516	0.331899	3.81188	0.000137913	0.00950065
Sc_g15543: wall-associated receptor kinase 2-like	Sc_g15543	membrane			823	4363.48	1.96703	0.303972	6.4711	9.72915e-11	9.96809e-08
Sc_g15614: lachrymatory-factor synthase	Sc_g15614	nucleus, cytoplasm	protein phosphatase inhibitor activity, abscisic acid binding, signaling receptor activity	abscisic acid-activated signaling pathway, negative regulation of phosphoprotein phosphatase activity, regulation of protein serine/threonine phosphatase activity	1611	36.2864	4.53318	1.16944	3.87638	0.000106024	0.00785962
Sc_g15723: glycosyltransferase, CAZy family GT2	Sc_g15723	membrane			3660	191.858	-1.51778	0.440216	-3.44781	0.000565156	0.0250278
Sc_g15947: myb-like protein Q	Sc_g15947		DNA binding		2412	445.875	-2.11908	0.465449	-4.55277	5.29448e-06	0.00082649
Sc_g16022: transcription factor EGL1-like	Sc_g16022		protein dimerization activity		1949	525.26	1.31926	0.280407	4.70481	2.541e-06	0.000468368
Sc_g16135: ---NA---	Sc_g16135				687	144.2	1.07933	0.301344	3.58172	0.000341334	0.0171169
Sc_g16173: putative rRNA methyltransferase	Sc_g16173	nucleus	rRNA methyltransferase activity	rRNA methylation	2837	786.338	-1.00555	0.249968	-4.02271	5.75312e-05	0.00544948
Sc_g16398: ethylene-overproduction protein 1	Sc_g16398		protein binding		3549	391.898	-1.21594	0.306617	-3.96567	7.31913e-05	0.00614111

## Sheet: Table S6 Species Overlap at T30
names	transcript_id	cell_components_terms	mol_functions_terms	bio_process_terms	length
Sc_g02351: BES1/BZR1 homolog protein 4-like isoform X1	Sc_g02351		DNA-binding transcription factor activity, beta-amylase activity, amylopectin maltohydrolase activity	regulation of transcription, DNA-templated, brassinosteroid mediated signaling pathway	1896
Sc_g05313: uncharacterized protein LOC112277919	Sc_g05313	integral component of membrane			2219
Sc_g05631: late embryogenesis abundant protein, group 3-like	Sc_g05631				2013
Sc_g05714: Peroxisomal membrane 22 kDa (Mpv17/PMP22) family protein	Sc_g05714	cytoplasm, integral component of membrane			1639
Sc_g06791: protein MOTHER of FT and TFL1-like isoform X1	Sc_g06791				1205
Sc_g08899: protein EARLY-RESPONSIVE TO DEHYDRATION 7, chloroplastic-like isoform X2	Sc_g08899				1880
Sc_g10016: beta-carotene hydroxylase	Sc_g10016	integral component of membrane	iron ion binding, oxidoreductase activity	lipid biosynthetic process, oxidation-reduction process	1586
Sc_g10057: protein SRC2-like	Sc_g10057	membrane, integral component of membrane			1069
Sc_g10629: hypothetical protein PHYPA_004803	Sc_g10629				568
Sc_g10637: hypothetical protein PHYPA_004803	Sc_g10637				1233
Sc_g11968: stress protein DDR48-like	Sc_g11968		metal ion binding		1793
Sc_g13670: uncharacterized protein LOC112287014	Sc_g13670	integral component of membrane			1192
Sc_g13874: Late embryogenesis abundant protein D-29	Sc_g13874	cytosol		floral organ abscission	2046

## Sheet: Table S7 Species-Specific LRT
names	transcript_id	cell_components_terms	mol_functions_terms	bio_process_terms	length	baseMean	stat	pvalue	padj
Sc_g00254: splicing factor 3B subunit 3-like	Sc_g00254	nucleus	nucleic acid binding, protein binding	mRNA splicing, via spliceosome	1774	1342.84	15.8013	0.000370508	0.0455007
Sc_g00568: putative 12-oxophytodienoate reductase 11	Sc_g00568		FMN binding, oxidoreductase activity	oxidation-reduction process	1723	326.423	36.3685	1.26672e-08	2.16641e-05
Sc_g00609: adenine phosphoribosyltransferase	Sc_g00609		transferase activity, transferase activity, transferring glycosyl groups		973	396.654	36.5783	1.14058e-08	2.16641e-05
Sc_g00809: aquaporin PIP1-2	Sc_g00809	vacuole, plasma membrane, plasmodesma, integral component of membrane	protein binding, water channel activity	water transport, response to water deprivation, transmembrane transport	1400	13005.2	22.7113	1.17034e-05	0.00428532
Sc_g00909: protein FORGETTER 1	Sc_g00909		metal ion binding	regulation of transcription, DNA-templated	4141	1663.68	22.4013	1.36653e-05	0.00443122
Sc_g02061: ACT domain-containing protein ACR3-like	Sc_g02061				1834	1391.3	15.507	0.000429231	0.047709
Sc_g02101: uncharacterized protein LOC112289292 isoform X3	Sc_g02101	integral component of membrane			1309	1510.06	18.7152	8.63091e-05	0.0178921
Sc_g02351: BES1/BZR1 homolog protein 4-like isoform X1	Sc_g02351		DNA-binding transcription factor activity, beta-amylase activity, amylopectin maltohydrolase activity	regulation of transcription, DNA-templated, brassinosteroid mediated signaling pathway	1896	575.056	22.075	1.60867e-05	0.00473083
Sc_g02570: GDSL esterase/lipase 5-like	Sc_g02570	membrane	hydrolase activity, acting on ester bonds		1586	763.212	15.4902	0.000432866	0.047709
Sc_g02748: serine/threonine-protein phosphatase PP-X isozyme 2	Sc_g02748		phosphoprotein phosphatase activity	protein dephosphorylation	1494	570.784	17.898	0.000129866	0.0252205
Sc_g02848: protein PROTON GRADIENT REGULATION 5, chloroplastic	Sc_g02848	chloroplast	electron transfer activity	response to high light intensity, photosynthetic electron transport in photosystem I	1021	1254.82	33.285	5.91903e-08	7.44646e-05
Sc_g03122: NAC domain-containing protein 86-like isoform X2	Sc_g03122	nucleus, integral component of membrane	DNA binding	regulation of transcription, DNA-templated	2357	8187.77	16.2555	0.000295233	0.0412182
Sc_g03123: alpha-glucan water dikinase 1, chloroplastic	Sc_g03123		ATP binding, alpha-glucan, water dikinase activity	phosphorylation	4712	1072.85	23.3074	8.68683e-06	0.00371416
Sc_g03458: NAC domain-containing protein 86-like isoform X2	Sc_g03458	nucleus, integral component of membrane	DNA binding	regulation of transcription, DNA-templated	2313	7652	15.3673	0.000460282	0.047709
Sc_g03554: putative CAAX amino terminal protease	Sc_g03554	membrane			1016	573.222	25.3762	3.08769e-06	0.00162484
Sc_g04152: uncharacterized protein LOC112281148	Sc_g04152	integral component of membrane			727	1316.04	15.2049	0.000499219	0.049495
Sc_g04413: ribosomal protein S19 (chloroplast)	Sc_g04413	ribosome, chloroplast, plastid, small ribosomal subunit	RNA binding, structural constituent of ribosome, rRNA binding	translation	1928	993.385	17.3438	0.000171333	0.0293023
Sc_g04886: phytochrome	Sc_g04886			phosphorelay signal transduction system, regulation of transcription, DNA-templated	1868	3436.13	18.0339	0.000121335	0.0244134
Sc_g04889: E3 ubiquitin-protein ligase At1g12760-like isoform X1	Sc_g04889	membrane			1756	920.643	15.7318	0.000383606	0.0455007
Sc_g04973: phytochrome	Sc_g04973	nucleus	phosphorelay sensor kinase activity, photoreceptor activity, protein homodimerization activity	phosphorelay signal transduction system, regulation of transcription, DNA-templated, detection of visible light, red, far-red light phototransduction, protein-tetrapyrrole linkage, protein-chromophore linkage, signal transduction by protein phosphorylation	3908	2569.98	17.5244	0.000156544	0.0274594
Sc_g05211: treponemal membrane protein B-like isoform X1	Sc_g05211				832	1577.58	27.4793	1.07882e-06	0.000670926
Sc_g05340: uncharacterized protein LOC112290220	Sc_g05340	chloroplast, integral component of membrane			1041	611.748	16.6831	0.000238405	0.0359417
Sc_g05389: microsomal glutathione S-transferase 3-like	Sc_g05389	nuclear envelope, endoplasmic reticulum, integral component of membrane	glutathione transferase activity, glutathione peroxidase activity		694	82.725	15.2517	0.00048768	0.049495
Sc_g05890: predicted protein	Sc_g05890		iron ion binding		775	835.333	19.37	6.22112e-05	0.0132996
Sc_g06561: uncharacterized protein LOC112288045	Sc_g06561	membrane		metabolic process	1175	1445.01	17.1515	0.000188629	0.0300096
Sc_g06752: probable esterase KAI2	Sc_g06752		hydrolase activity	de-etiolation, response to karrikin	1176	442.96	23.3198	8.63329e-06	0.00371416
Sc_g06863: uncharacterized protein LOC112282501	Sc_g06863				2237	1101.69	16.6128	0.000246931	0.0359417
Sc_g07148: transcription factor PIF4	Sc_g07148	nucleus	DNA-binding transcription activator activity, RNA polymerase II-specific, protein dimerization activity	positive regulation of transcription by RNA polymerase II	2641	2276.46	19.7013	5.27142e-05	0.0124351
Sc_g07164: cytoplasmic FMR1 interacting protein	Sc_g07164				2594	700.124	16.4318	0.000270325	0.038527
Sc_g07311: lipid phosphate phosphatase 2-like	Sc_g07311	integral component of membrane	phosphatidate phosphatase activity		1484	2210.65	20.5007	3.53459e-05	0.00930004
Sc_g08003: uncharacterized protein LOC112293091	Sc_g08003	integral component of membrane			848	3226.7	27.5434	1.04479e-06	0.000670926
Sc_g08043: uncharacterized protein LOC112277374 isoform X3	Sc_g08043				4136	2687.28	16.0003	0.000335412	0.0441261
Sc_g08183: non-specific lipid-transfer protein-like	Sc_g08183		fatty acid binding	systemic acquired resistance	855	59.518	17.1894	0.000185081	0.0300096
Sc_g08728: Core-2/I-branching beta-16-N-acetylglucosaminyltransferase family protein	Sc_g08728	membrane	acetylglucosaminyltransferase activity		1123	677.621	56.5273	5.31186e-13	3.63384e-09
Sc_g08899: protein EARLY-RESPONSIVE TO DEHYDRATION 7, chloroplastic-like isoform X2	Sc_g08899				1880	964.381	19.4835	5.87773e-05	0.0132996
Sc_g09051: protein NEOXANTHIN-DEFICIENT 1-like isoform X1	Sc_g09051		lyase activity		975	38.1402	19.3969	6.138e-05	0.0132996
Sc_g09325: chloroplastic early light-induced protein	Sc_g09325	integral component of membrane			908	486.368	27.1781	1.25417e-06	0.000714984
Sc_g09695: CASP-like protein 1C1	Sc_g09695	plasma membrane, integral component of membrane	4 iron, 4 sulfur cluster binding		1057	1940.45	15.4013	0.000452541	0.047709
Sc_g10002: midasin-like isoform X2	Sc_g10002				1963	1353.46	15.3888	0.000455369	0.047709
Sc_g10121: Arsenical pump ATPase	Sc_g10121	plastoglobule			1657	1378.49	20.0711	4.38152e-05	0.0110637
Sc_g10213: ABC1/COQ8 Serine/Threonine kinase	Sc_g10213		protein kinase activity, ATP binding	protein phosphorylation	2931	1540.36	22.4722	1.31895e-05	0.00443122
Sc_g10410: ABA-inducible protein PHV A1-like	Sc_g10410	membrane, integral component of membrane			1149	3731.11	15.3929	0.000454447	0.047709
Sc_g10759: NPC intracellular cholesterol transporter 1-like	Sc_g10759	integral component of membrane	lipid transporter activity		4464	1928.75	33.0882	6.53103e-08	7.44646e-05
Sc_g11011: coenzyme Q-binding protein COQ10 homolog, mitochondrial	Sc_g11011				1206	535.414	15.8914	0.00035418	0.0455007
Sc_g11375: mevalonate kinase	Sc_g11375	cytoplasm	ATP binding, kinase activity	steroid biosynthetic process, phosphate-containing compound metabolic process, isoprenoid biosynthetic process	1733	667.957	17.6825	0.00014464	0.0267428
Sc_g11391: hybrid signal transduction histidine kinase M-like protein	Sc_g11391		DNA binding, kinase activity	phosphorylation	1566	1482.67	20.0051	4.52833e-05	0.0110637
Sc_g11555: caffeoylshikimate esterase-like	Sc_g11555	membrane			1740	1439.28	15.5727	0.000415357	0.0473576
Sc_g11772: monooxygenase family protein	Sc_g11772	integral component of membrane	FAD binding		1487	1610.67	15.7958	0.000371526	0.0455007
Sc_g11927: ---NA---	Sc_g11927				596	122.741	16.0986	0.000319333	0.0428344
Sc_g12651: uncharacterized protein LOC112286145	Sc_g12651				840	2702.95	22.0126	1.6597e-05	0.00473083
Sc_g12657: uncharacterized protein LOC112283607	Sc_g12657				887	383.068	31.3692	1.54265e-07	0.000117258
Sc_g13104: GTP-binding protein SAR1A	Sc_g13104	Golgi apparatus, COPII vesicle coat, endoplasmic reticulum exit site	GTPase activity, GTP binding	regulation of COPII vesicle coating, positive regulation of protein exit from endoplasmic reticulum	982	1232.04	22.7752	1.13351e-05	0.00428532
Sc_g13205: ---NA---	Sc_g13205				1069	5184.41	17.0983	0.000193711	0.0301177
Sc_g13286: histone deacetylase complex subunit SAP30L-like isoform X3	Sc_g13286		protein binding		2322	1002.6	15.2086	0.000498302	0.049495
Sc_g13403: uncharacterized protein LOC112285453 isoform X2	Sc_g13403				761	1114.64	36.472	1.20286e-08	2.16641e-05
Sc_g13432: nuclear pore complex protein NUP62-like	Sc_g13432	nuclear pore, cytosol, integral component of membrane, nuclear periphery	structural constituent of nuclear pore	nucleocytoplasmic transport, negative regulation of auxin mediated signaling pathway	2731	522.699	15.7877	0.000373025	0.0455007
Sc_g13542: late embryogenesis abundant protein	Sc_g13542				892	1735.19	17.6098	0.000149993	0.0270026
Sc_g13657: short-chain dehydrogenase TIC 32, chloroplastic-like	Sc_g13657		oxidoreductase activity, acting on the CH-OH group of donors, NAD or NADP as acceptor	oxidation-reduction process	1347	1319.5	15.591	0.000411592	0.0473576
Sc_g13667: glutaredoxin	Sc_g13667	cytoplasm	electron transfer activity, protein disulfide oxidoreductase activity	electron transport chain, cell redox homeostasis	657	3633.06	22.3175	1.42504e-05	0.00443122
Sc_g13823: protein cereblon-like isoform X1	Sc_g13823		metal ion binding		2653	3354.67	15.7205	0.000385768	0.0455007
Sc_g14304: hypothetical protein MARPO_0010s0178	Sc_g14304		iron ion binding, oxidoreductase activity	oxidation-reduction process	1595	1735.19	31.866	1.20332e-07	0.000102899
Sc_g14379: poly [ADP-ribose] polymerase 3	Sc_g14379		NAD+ ADP-ribosyltransferase activity	protein ADP-ribosylation	2917	2545.4	16.1112	0.000317315	0.0428344
Sc_g14586: pectinesterase 2-like	Sc_g14586	cell wall	enzyme inhibitor activity, pectinesterase activity	cell wall modification	1989	298.14	32.1847	1.0261e-07	0.000100279
Sc_g14893: type I inositol polyphosphate 5-phosphatase 8-like isoform X1	Sc_g14893		hydrolase activity	phosphatidylinositol dephosphorylation	3014	1350.72	17.2653	0.000178189	0.0297314
Sc_g15730: uncharacterized protein LOC112288774	Sc_g15730				2090	2168.47	21.3898	2.26607e-05	0.00620087
Sc_g15760: cyclic dof factor 4-like	Sc_g15760		DNA binding	regulation of transcription, DNA-templated	2396	1847.99	22.6776	1.19019e-05	0.00428532
Sc_g15763: basic leucine zipper 61-like isoform X1	Sc_g15763		DNA-binding transcription factor activity	regulation of transcription, DNA-templated	2504	831.842	16.6143	0.000246749	0.0359417
Sc_g15997: protein DOG1-like 3	Sc_g15997		sequence-specific DNA binding	transcription, DNA-templated	1831	363.201	17.8545	0.00013272	0.0252205
Sc_g16405: serine/threonine-protein kinase tricorner-like isoform X1	Sc_g16405	intracellular	protein serine/threonine kinase activity, ATP binding	peptidyl-serine phosphorylation, intracellular signal transduction	2701	2682.4	25.1874	3.39341e-06	0.00165816

## Sheet: Table S8 LRT Clusters
transcript_id	cluster	names	cell_components_terms	mol_functions_terms	bio_process_terms	length
Sc_g00254	I	Sc_g00254: splicing factor 3B subunit 3-like	nucleus	nucleic acid binding, protein binding	mRNA splicing, via spliceosome	1774
Sc_g02061	I	Sc_g02061: ACT domain-containing protein ACR3-like				1834
Sc_g02351	I	Sc_g02351: BES1/BZR1 homolog protein 4-like isoform X1		DNA-binding transcription factor activity, beta-amylase activity, amylopectin maltohydrolase activity	regulation of transcription, DNA-templated, brassinosteroid mediated signaling pathway	1896
Sc_g03458	I	Sc_g03458: NAC domain-containing protein 86-like isoform X2	nucleus, integral component of membrane	DNA binding	regulation of transcription, DNA-templated	2313
Sc_g04886	I	Sc_g04886: phytochrome			phosphorelay signal transduction system, regulation of transcription, DNA-templated	1868
Sc_g04889	I	Sc_g04889: E3 ubiquitin-protein ligase At1g12760-like isoform X1	membrane			1756
Sc_g04973	I	Sc_g04973: phytochrome	nucleus	phosphorelay sensor kinase activity, photoreceptor activity, protein homodimerization activity	phosphorelay signal transduction system, regulation of transcription, DNA-templated, detection of visible light, red, far-red light phototransduction, protein-tetrapyrrole linkage, protein-chromophore linkage, signal transduction by protein phosphorylation	3908
Sc_g08043	I	Sc_g08043: uncharacterized protein LOC112277374 isoform X3				4136
Sc_g10002	I	Sc_g10002: midasin-like isoform X2				1963
Sc_g13286	I	Sc_g13286: histone deacetylase complex subunit SAP30L-like isoform X3		protein binding		2322
Sc_g14893	I	Sc_g14893: type I inositol polyphosphate 5-phosphatase 8-like isoform X1		hydrolase activity	phosphatidylinositol dephosphorylation	3014
Sc_g15730	I	Sc_g15730: uncharacterized protein LOC112288774				2090
Sc_g15760	I	Sc_g15760: cyclic dof factor 4-like		DNA binding	regulation of transcription, DNA-templated	2396
Sc_g00568	II	Sc_g00568: putative 12-oxophytodienoate reductase 11		FMN binding, oxidoreductase activity	oxidation-reduction process	1723
Sc_g02570	II	Sc_g02570: GDSL esterase/lipase 5-like	membrane	hydrolase activity, acting on ester bonds		1586
Sc_g02748	II	Sc_g02748: serine/threonine-protein phosphatase PP-X isozyme 2		phosphoprotein phosphatase activity	protein dephosphorylation	1494
Sc_g02848	II	Sc_g02848: protein PROTON GRADIENT REGULATION 5, chloroplastic	chloroplast	electron transfer activity	response to high light intensity, photosynthetic electron transport in photosystem I	1021
Sc_g05340	II	Sc_g05340: uncharacterized protein LOC112290220	chloroplast, integral component of membrane			1041
Sc_g05389	II	Sc_g05389: microsomal glutathione S-transferase 3-like	nuclear envelope, endoplasmic reticulum, integral component of membrane	glutathione transferase activity, glutathione peroxidase activity		694
Sc_g06561	II	Sc_g06561: uncharacterized protein LOC112288045	membrane		metabolic process	1175
Sc_g06752	II	Sc_g06752: probable esterase KAI2		hydrolase activity	de-etiolation, response to karrikin	1176
Sc_g08183	II	Sc_g08183: non-specific lipid-transfer protein-like		fatty acid binding	systemic acquired resistance	855
Sc_g11555	II	Sc_g11555: caffeoylshikimate esterase-like	membrane			1740
Sc_g13104	II	Sc_g13104: GTP-binding protein SAR1A	Golgi apparatus, COPII vesicle coat, endoplasmic reticulum exit site	GTPase activity, GTP binding	regulation of COPII vesicle coating, positive regulation of protein exit from endoplasmic reticulum	982
Sc_g13667	II	Sc_g13667: glutaredoxin	cytoplasm	electron transfer activity, protein disulfide oxidoreductase activity	electron transport chain, cell redox homeostasis	657
Sc_g15997	II	Sc_g15997: protein DOG1-like 3		sequence-specific DNA binding	transcription, DNA-templated	1831
Sc_g00609	III	Sc_g00609: adenine phosphoribosyltransferase		transferase activity, transferase activity, transferring glycosyl groups		973
Sc_g04413	III	Sc_g04413: ribosomal protein S19 (chloroplast)	ribosome, chloroplast, plastid, small ribosomal subunit	RNA binding, structural constituent of ribosome, rRNA binding	translation	1928
Sc_g08899	III	Sc_g08899: protein EARLY-RESPONSIVE TO DEHYDRATION 7, chloroplastic-like isoform X2				1880
Sc_g10410	III	Sc_g10410: ABA-inducible protein PHV A1-like	membrane, integral component of membrane			1149
Sc_g11011	III	Sc_g11011: coenzyme Q-binding protein COQ10 homolog, mitochondrial				1206
Sc_g12657	III	Sc_g12657: uncharacterized protein LOC112283607				887
Sc_g00809	IV	Sc_g00809: aquaporin PIP1-2	vacuole, plasma membrane, plasmodesma, integral component of membrane	protein binding, water channel activity	water transport, response to water deprivation, transmembrane transport	1400
Sc_g04152	IV	Sc_g04152: uncharacterized protein LOC112281148	integral component of membrane			727
Sc_g05890	IV	Sc_g05890: predicted protein		iron ion binding		775
Sc_g06863	IV	Sc_g06863: uncharacterized protein LOC112282501				2237
Sc_g07148	IV	Sc_g07148: transcription factor PIF4	nucleus	DNA-binding transcription activator activity, RNA polymerase II-specific, protein dimerization activity	positive regulation of transcription by RNA polymerase II	2641
Sc_g07311	IV	Sc_g07311: lipid phosphate phosphatase 2-like	integral component of membrane	phosphatidate phosphatase activity		1484
Sc_g08728	IV	Sc_g08728: Core-2/I-branching beta-16-N-acetylglucosaminyltransferase family protein	membrane	acetylglucosaminyltransferase activity		1123
Sc_g10121	IV	Sc_g10121: Arsenical pump ATPase	plastoglobule			1657
Sc_g11375	IV	Sc_g11375: mevalonate kinase	cytoplasm	ATP binding, kinase activity	steroid biosynthetic process, phosphate-containing compound metabolic process, isoprenoid biosynthetic process	1733
Sc_g11391	IV	Sc_g11391: hybrid signal transduction histidine kinase M-like protein		DNA binding, kinase activity	phosphorylation	1566
Sc_g11927	IV	Sc_g11927: ---NA---				596
Sc_g12651	IV	Sc_g12651: uncharacterized protein LOC112286145				840
Sc_g13205	IV	Sc_g13205: ---NA---				1069
Sc_g13403	IV	Sc_g13403: uncharacterized protein LOC112285453 isoform X2				761
Sc_g13542	IV	Sc_g13542: late embryogenesis abundant protein				892
Sc_g13657	IV	Sc_g13657: short-chain dehydrogenase TIC 32, chloroplastic-like		oxidoreductase activity, acting on the CH-OH group of donors, NAD or NADP as acceptor	oxidation-reduction process	1347
Sc_g13823	IV	Sc_g13823: protein cereblon-like isoform X1		metal ion binding		2653
Sc_g14304	IV	Sc_g14304: hypothetical protein MARPO_0010s0178		iron ion binding, oxidoreductase activity	oxidation-reduction process	1595
Sc_g14379	IV	Sc_g14379: poly [ADP-ribose] polymerase 3		NAD+ ADP-ribosyltransferase activity	protein ADP-ribosylation	2917
Sc_g00909	V	Sc_g00909: protein FORGETTER 1		metal ion binding	regulation of transcription, DNA-templated	4141
Sc_g03122	V	Sc_g03122: NAC domain-containing protein 86-like isoform X2	nucleus, integral component of membrane	DNA binding	regulation of transcription, DNA-templated	2357
Sc_g03123	V	Sc_g03123: alpha-glucan water dikinase 1, chloroplastic		ATP binding, alpha-glucan, water dikinase activity	phosphorylation	4712
Sc_g07164	V	Sc_g07164: cytoplasmic FMR1 interacting protein				2594
Sc_g09051	V	Sc_g09051: protein NEOXANTHIN-DEFICIENT 1-like isoform X1		lyase activity		975
Sc_g10213	V	Sc_g10213: ABC1/COQ8 Serine/Threonine kinase		protein kinase activity, ATP binding	protein phosphorylation	2931
Sc_g13432	V	Sc_g13432: nuclear pore complex protein NUP62-like	nuclear pore, cytosol, integral component of membrane, nuclear periphery	structural constituent of nuclear pore	nucleocytoplasmic transport, negative regulation of auxin mediated signaling pathway	2731
Sc_g14586	V	Sc_g14586: pectinesterase 2-like	cell wall	enzyme inhibitor activity, pectinesterase activity	cell wall modification	1989
Sc_g15763	V	Sc_g15763: basic leucine zipper 61-like isoform X1		DNA-binding transcription factor activity	regulation of transcription, DNA-templated	2504
Sc_g16405	V	Sc_g16405: serine/threonine-protein kinase tricorner-like isoform X1	intracellular	protein serine/threonine kinase activity, ATP binding	peptidyl-serine phosphorylation, intracellular signal transduction	2701
Sc_g02101	VI	Sc_g02101: uncharacterized protein LOC112289292 isoform X3	integral component of membrane			1309
Sc_g03554	VI	Sc_g03554: putative CAAX amino terminal protease	membrane			1016
Sc_g05211	VI	Sc_g05211: treponemal membrane protein B-like isoform X1				832
Sc_g08003	VI	Sc_g08003: uncharacterized protein LOC112293091	integral component of membrane			848
Sc_g09325	VI	Sc_g09325: chloroplastic early light-induced protein	integral component of membrane			908
Sc_g09695	VI	Sc_g09695: CASP-like protein 1C1	plasma membrane, integral component of membrane	4 iron, 4 sulfur cluster binding		1057
Sc_g10759	VI	Sc_g10759: NPC intracellular cholesterol transporter 1-like	integral component of membrane	lipid transporter activity		4464
Sc_g11772	VI	Sc_g11772: monooxygenase family protein	integral component of membrane	FAD binding		1487
